# Supplementary material
Source: Elsevier journal article supplement (https://www.sciencedirect.com/science/article/pii/S0021755719300117)
Supplement: mmc1 [file S0021755719300117:mmc1.docx]

JPED_2019_11 – Oiginal

Supplementary Material

**Table S1 - Quick Pediatric Logistic Organ Dysfunction-2 Criteria (only supplemental material).**

|  |  | Criteria |  |  |
| --- | --- | --- | --- | --- |
| Altered |  | Hypotension |  | Tachycardia |
| Mentation |  | Systolic blood pressure (mmHg) | Mean blood pressure (mmHg) |  |
| Glasgow Coma  Score < 11 | < 1 month  1-11 months  12-23 months  24-59 months  60-143 months  ≥ 144 months | < 65  < 75  < 85  < 85  < 85  < 85 | < 46  < 55  < 60  < 62  < 65  < 67 | < 12 years > 195  ≥ 12 years > 150 |
| Score  Absent 0/present 1 |  | Absent | 0/present 1 | Absent 0/present 1 |
